# Supplementary material for: Changing Exposure Perceptions: A Randomized Controlled Trial of an Intervention with Smoking Parents
Source: PubMed Central journal article supplement (PMC7277098; doi:10.3390/ijerph17103349), 2020-05-12
Supplement: ijerph-17-03349-s001.pdf [file ijerph-17-03349-s001.pdf]

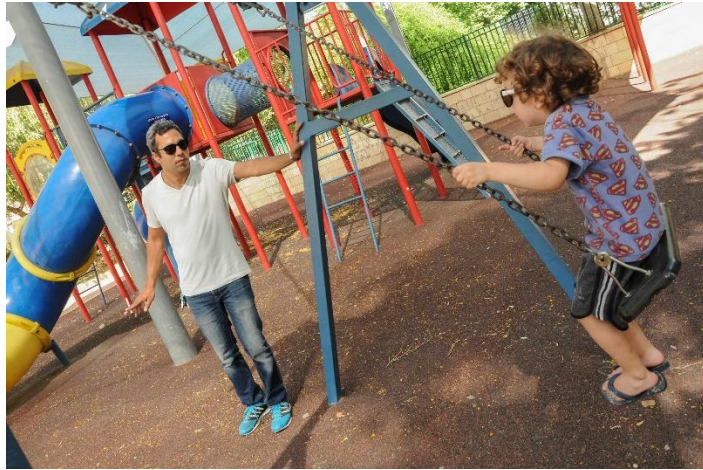

1 2 3 4 5 6 7

not at all exposed

highly exposed

3.

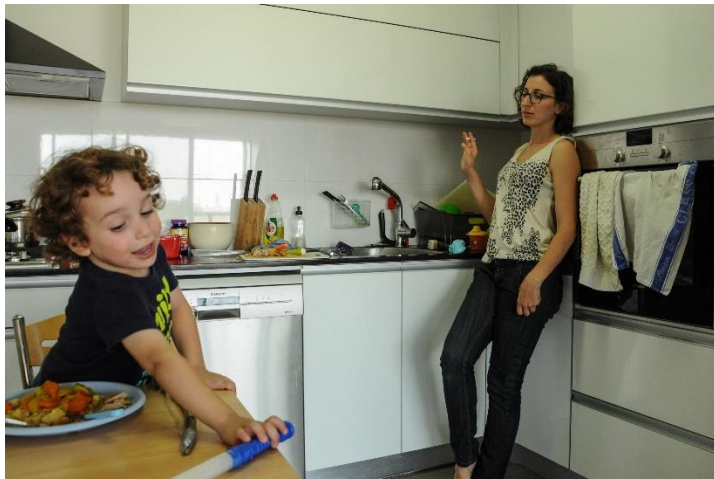

1 2 3 4 5 6 7

not at all exposed

highly exposed

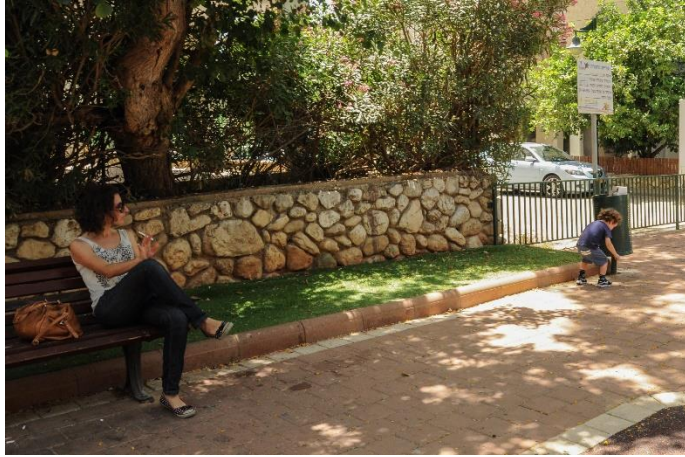

4.

1 2 3 4 5 6 7

not at all  
exposed

highly  
exposed

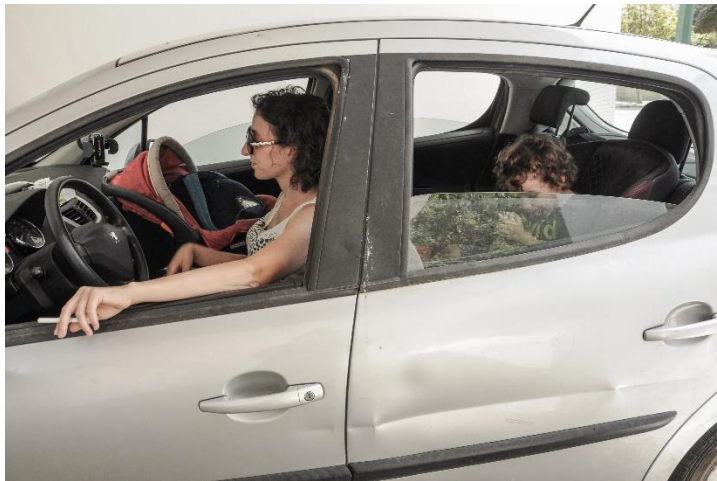

5.

1 2 3 4 5 6 7

not at all  
exposed

highly  
exposed

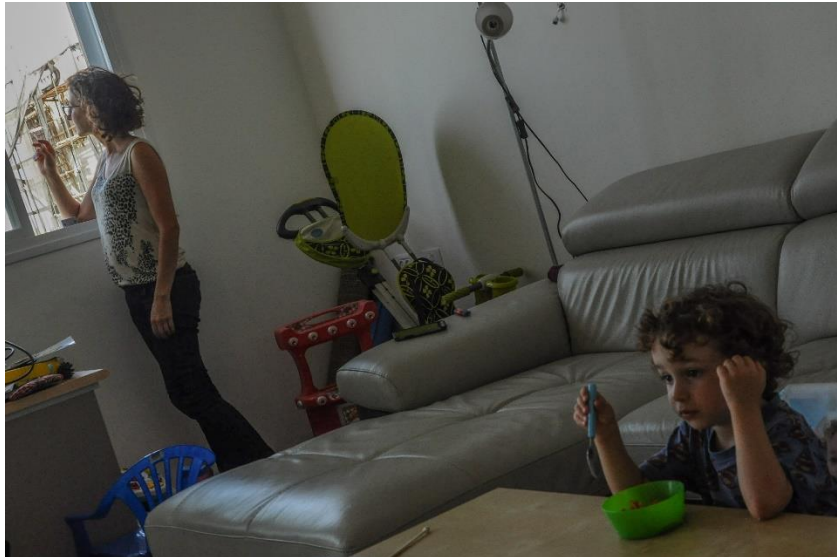

6.

1 2 3 4 5 6 7

not at all exposed    ○   ○   ○   ○   ○   ○   ○    highly exposed

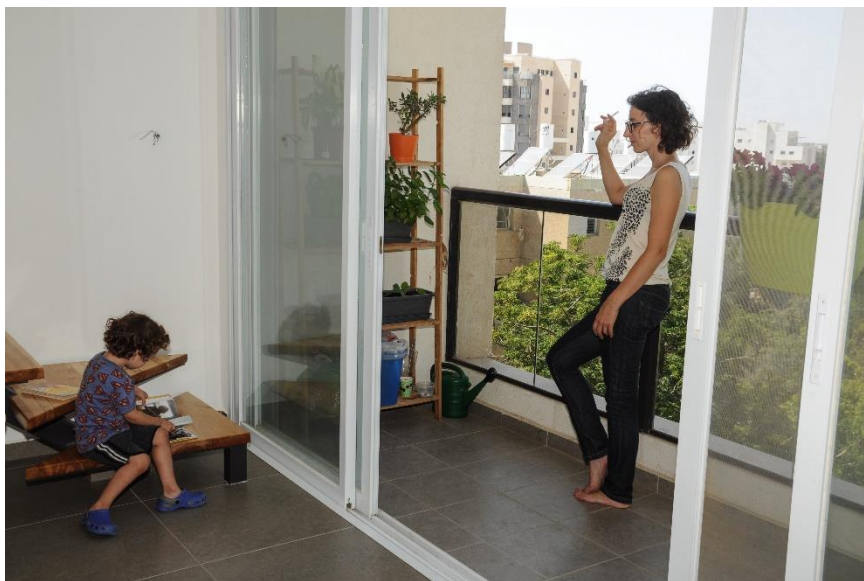

7.

1 2 3 4 5 6 7

not at all exposed    ○   ○   ○   ○   ○   ○   ○    highly exposed





17. The child is in the playground and sees his mother smoking and can smell the smoke

1   2   3   4   5   6   7

not at all exposed                        highly exposed

18. What proportion of tobacco smoke is invisible?

- 20%
- 50%
- 80%

19. After smoking in the home, how long does it take for the home to be smoke-free? \_\_\_\_\_ (open response)

20. After smoking in the car, how long does it take for the car to be free of smoke? \_\_\_\_\_ (open response)

21. Do you consider yourself to have sufficient information on the subject of passive smoking?

1   2   3   4   5   6   7

not at all                        very much

22. How confident did you feel of your answers?

1   2   3   4   5   6   7

not at all                        very much

23. Did you find it difficult to answer the questionnaire?

1   2   3   4   5   6   7

not at all                        very much

**Thank you for your participation!**
